# Supplementary material
Source: PubMed Central journal article supplement (PMC2646595)

**Supplemental Fig 1.** SF-1 pocket mutant A270W/L345F SF-1 does not bind or exchange ligands. Peaks corresponding to the mutant apo-LBD before and after the ligand exchange procedure are shown in gray and black, respectively.

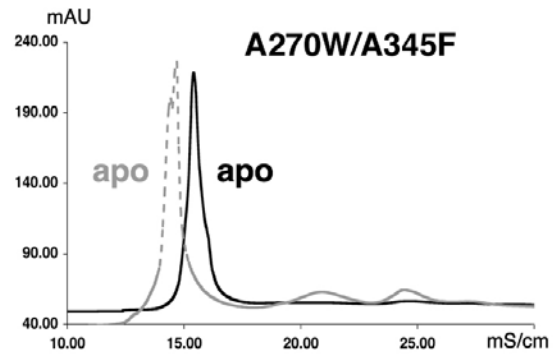

Supplement: me.2007-0508_1.pdf [file me.2007-0508_1.pdf]
